#### EDITORIAL NOTE

## Editorial Note: Do smart services promote sustainable green transformation? Evidence from Chinese listed manufacturing enterprises

The *PLOS One* Editors

The *PLOS One* Editors issue this Editorial Note because this article [1] was identified as one of a series of submissions for which we have concerns about aspects of the peer review process. Readers are advised to interpret the article [1] with caution.

The Editors have no evidence of any author involvement in the peer review concerns.

### Reference

1. Chen Y, Xu B, Hou Y. Do smart services promote sustainable green transformation? Evidence from Chinese listed manufacturing enterprises. *PLoS One*. 2023;18(4):e0284452. <https://doi.org/10.1371/journal.pone.0284452> PMID: [37104471](https://pubmed.ncbi.nlm.nih.gov/37104471/)

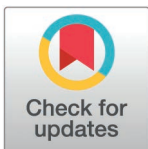

### OPEN ACCESS

**Citation:** The *PLOS One* Editors (2026) Editorial Note: Do smart services promote sustainable green transformation? Evidence from Chinese listed manufacturing enterprises. *PLoS One* 21(5): e0349914. <https://doi.org/10.1371/journal.pone.0349914>

**Published:** May 28, 2026

**Copyright:** © 2026 The *PLOS One* Editors. This is an open access article distributed under the terms of the [Creative Commons Attribution License](https://creativecommons.org/licenses/by/4.0/), which permits unrestricted use, distribution, and reproduction in any medium, provided the original author and source are credited.
